# Supplementary material for: Evaluation of Wild Peanut Species and Their Allotetraploids for Resistance against Thrips and Thrips-Transmitted Tomato Spotted Wilt Orthotospovirus (TSWV)
Source: MDPI journal article supplement (doi:10.3390/pathogens12091102), 2023-08-28
Supplement: s1 [file s1]

# Evaluation of Wild Peanut Species and their Allotetraploids for Resistance Against Thrips and Thrips-Transmitted Tomato Spotted Wilt Orthotospovirus (TSWV)

Yi-Ju Chen<sup>1</sup>, Sudeep Pandey<sup>1</sup>, Michael Catto<sup>2</sup>, Soraya Leal-Bertioli<sup>3,4</sup>, Mark R. Abney<sup>5</sup>, Sudeep Bag<sup>6</sup>, Mark Hopkins<sup>4</sup>, Albert Culbreath<sup>6</sup> and Rajagopalbabu Srinivasan<sup>1\*</sup>

<sup>1</sup> Department of Entomology, University of Georgia, Griffin, GA 30223, USA; yijuchen@uga.edu, su-deep.pandey@uga.edu

<sup>2</sup> Department of Entomology, University of Georgia, Athens, GA 30602, USA; mac65630@uga.edu

<sup>3</sup> Department of Plant Pathology, University of Georgia, Athens, GA 30602, U.S.A; sorayab@uga.edu

<sup>4</sup> Institute of Plant Breeding, Genetics and Genomics, University of Georgia, Athens, GA 30602, U.S.A mark.hopkins@uga.edu

<sup>5</sup> Department of Entomology, University of Georgia, Tifton, GA 31794; U.S.A.; mrabney@uga.edu

<sup>6</sup> Department of Plant Pathology, University of Georgia, Tifton, GA 31793, USA; sudeepbag@uga.edu

\* Correspondence: babusri@uga.edu

## Materials and Methods

### S1. Thrips feeding damage index

| Scale (0-3)                                  | 0                                                                                   | 1                                                                                    | 2                                                                                     | 3                                                                                     |
|----------------------------------------------|-------------------------------------------------------------------------------------|--------------------------------------------------------------------------------------|---------------------------------------------------------------------------------------|---------------------------------------------------------------------------------------|
| Feeding scar intensity of individual leaflet | None                                                                                | <25%                                                                                 | 25-50%                                                                                | >50%                                                                                  |
|                                              |  |  |  |  |

**Figure S1.** Thrips feeding scar intensity scale 0-3.
